# Supplementary material for: Gestational age and newborn size according to parental social mobility: an intergenerational cohort study
Source: PubMed Central journal article supplement (PMC4602273; doi:10.1136/jech-2014-205377), 2015-06-24
Supplement: jech-2014-205377-s1.pdf [file jech-2014-205377-s1.pdf]

Supplementary Table 1. Characteristics of the children at birth.

| Variable at birth       | n   | Means | SD   | Minimum | Maximum |
|-------------------------|-----|-------|------|---------|---------|
| Weight (g)              | 256 | 3120  | 588  | 680     | 4150    |
| Length (cm)             | 249 | 48.19 | 2.42 | 37      | 53.1    |
| Head circumference (cm) | 249 | 33.96 | 1.61 | 26.5    | 37      |
| Gestational age (week)  | 255 | 38.71 | 2.77 | 25      | 44      |
