# Supplementary material for: Gestational age and newborn size according to parental social mobility: an intergenerational cohort study
Source: PubMed Central journal article supplement (PMC4602273; doi:10.1136/jech-2014-205377), 2015-06-24
Supplement: jech-2014-205377-s2.pdf [file jech-2014-205377-s2.pdf]

**Supplementary Table 2. Exposure: Early wealthy compared to early poor. Regression coefficient stratified by mediator (CI 95%)**

|                                   | <b>Total controlled effect</b> | <b>Natural direct effect</b> | <b>Natural indirect effect</b> | <b>Controlled direct effect</b> |
|-----------------------------------|--------------------------------|------------------------------|--------------------------------|---------------------------------|
| <b>Birthweight - grams</b>        |                                |                              |                                |                                 |
| Maternal birthweight              |                                |                              |                                |                                 |
| 2500                              | 202.9 (-22.0; 427.9)           | 277 (52.4; 501.7)            | -74.1 (-196.8; 48.6)           | 254.6 (34.1; 475.1)             |
| 3000                              | 366.5 (145.1; 587.8)           | 375 (152.1; 597.9)           | -8.6 (-132.7; 115.6)           | 287.3 (69.5; 505.0)             |
| 3500                              | 141.3 (-81.7; 364.4)           | 274.9 (49.1; 500.7)          | -133.6 (-257.4; -9.8)          | 224.6 (6.6; 442.5)              |
| Maternal BMI 2004                 |                                |                              |                                |                                 |
| 20                                | 276.7 (46.1; 507.2)            | 328.6 (103.4; 553.8)         | -51.9 (-190.4; 86.6)           | 448.5 (225.5; 671.6)            |
| 25                                | 298.6 (66.7; 530.4)            | 358.9 (133.5; 584.3)         | -60.4(-198.7; 78.0)            | 379.8 (157.1; 602.4)            |
| 30                                | 344.1 (114.0; 574.2)           | 240.6 (16.0; 465.2)          | 103.5 (-34.0; 241.1)           | 370.9 (147.5; 594.3)            |
| Maternal smoking                  |                                |                              |                                |                                 |
| No                                | 444.4 (219.9; 668.9)           | 365.1 (141.8; 588.4)         | 79.3 (-39.0; 197.6)            | 403.0 (179.4; 626.6)            |
| Yes                               | 376.6 (158.4; 594.8)           | 328.3 (109.6; 547.0)         | 48.3 (-66.8; 163.3)            | 324.5 (104.4; 544.6)            |
| <b>Birth length – centimetres</b> |                                |                              |                                |                                 |
| Maternal birthweight              |                                |                              |                                |                                 |
| 2500                              | 0.84 (-0.20; 1.88)             | 1.47 (0.44; 2.50)            | -0.63 (-1.19; -0.07)           | 0.85 (-0.16; 1.86)              |
| 3000                              | 0.74 (-0.29; 1.77)             | 0.84 (-0.18; 1.87)           | -0.11 (-0.67; 0.46)            | 1.39 (0.37; 2.41)               |
| 3500                              | 0.65 (-0.38; 1.69)             | 1.14 (0.11; 2.16)            | -0.48 (-1.04; 0.08)            | 1.04 (0.02; 2.06)               |
| Maternal BMI 2004                 |                                |                              |                                |                                 |
| 20                                | 1.01 (-0.06; 2.08)             | 1.38 (0.29; 2.47)            | -0.37 (-0.96; 0.22)            | 1.32 (0.25; 2.40)               |
| 25                                | 1.36 (0.27; 2.45)              | 1.26 (0.17; 2.35)            | 0.10 (-0.50; 0.69)             | 1.46 (0.38; 2.53)               |
| 30                                | 1.28 (0.21; 2.36)              | 1.34 (0.26; 2.42)            | -0.06 (-0.66; 0.53)            | 1.59 (0.51; 2.67)               |
| Maternal smoking                  |                                |                              |                                |                                 |
| No                                | 1.87 (0.80; 2.94)              | 1.71 (0.64; 2.79)            | 0.15 (-0.39; 0.70)             | 1.60 (0.52; 2.68)               |
| Yes                               | 1.13 (0.06; 2.20)              | 1.13 (0.06; 2.20)            | 0.00 (-0.54; 0.55)             | 1.64 (0.57; 2.71)               |

**Supplementary Table 2. Continuing**

|                                         | <b>Total controlled effect</b> | <b>Natural direct effect</b> | <b>Natural indirect effect</b> | <b>Controlled direct effect</b> |
|-----------------------------------------|--------------------------------|------------------------------|--------------------------------|---------------------------------|
| <b>Head circumference – centimetres</b> |                                |                              |                                |                                 |
| Maternal birthweight                    |                                |                              |                                |                                 |
| 2500                                    | 0.76 (0.01; 1.51)              | 0.80 (0.05; 1.55)            | -0.05 (-0.43; 0.34)            | 0.62 (-0.12; 1.35)              |
| 3000                                    | 0.70 (-0.04; 1.44)             | 0.45(-0.29; 1.19)            | 0.25 (-0.14; 0.64)             | 0.08 (-0.65; 0.81)              |
| 3500                                    | 0.59(-0.16; 1.33)              | 0.49 (-0.25; 1.23)           | 0.10 (-0.29; 0.48)             | 0.49 (-0.24; 1.22)              |
| Maternal BMI 2004                       |                                |                              |                                |                                 |
| 20                                      | 0.73 (-0.04; 1.49)             | 0.8 (0.02; 1.58)             | -0.08 (-0.49; 0.34)            | 0.88 (0.10; 1.65)               |
| 25                                      | 0.35 (-0.41; 1.12)             | 0.98 (0.20; 1.76)            | -0.63 (-1.04; -0.21)           | 0.96 (0.17; 1.74)               |
| 30                                      | 0.44 (-0.31; 1.20)             | 0.74 (-0.04; 1.52)           | -0.30 (-0.72; 0.12)            | 0.50 (-0.27; 1.28)              |
| Maternal smoking                        |                                |                              |                                |                                 |
| No                                      | 1.18 (0.39; 1.97)              | 1.05 (0.26; 1.84)            | 0.13 (-0.25; 0.50)             | 0.54 (-0.25; 1.32)              |
| Yes                                     | 1.06 (0.27; 1.84)              | 1.04 (0.26; 1.82)            | 0.02 (-0.36; 0.40)             | 0.66 (-0.13; 1.44)              |
| <b>Gestational age – weeks</b>          |                                |                              |                                |                                 |
| Maternal birthweight                    |                                |                              |                                |                                 |
| 2500                                    | 1.81 (0.76; 2.86)              | 1.86 (0.82; 2.90)            | -0.05 (-0.62; 0.51)            | 1.19 (0.15; 2.24)               |
| 3000                                    | 1.64 (0.59; 2.69)              | 1.64 (0.59; 2.69)            | 0.00 (-0.56; 0.56)             | 1.56 (0.52; 2.61)               |
| 3500                                    | 1.14 (0.10; 2.18)              | 1.45 (0.41; 2.48)            | -0.30 (-0.86; 0.25)            | 1.66 (0.63; 2.69)               |
| Maternal BMI 2004                       |                                |                              |                                |                                 |
| 20                                      | 2.21 (1.16; 3.27)              | 1.6 (0.54; 2.67)             | 0.61 (0.01; 1.20)              | 2.12 (1.07; 3.17)               |
| 25                                      | 1.52 (0.47; 2.58)              | 1.84 (0.79; 2.90)            | -0.32 (-0.91; 0.27)            | 1.79 (0.75; 2.82)               |
| 30                                      | 2.29 (1.24; 3.35)              | 1.66 (0.59; 2.72)            | 0.64 (0.04; 1.23)              | 2.12 (1.06; 3.18)               |
| Maternal smoking                        |                                |                              |                                |                                 |
| No                                      | 1.65 (0.60; 2.69)              | 1.67 (0.63; 2.71)            | -0.02 (-0.57; 0.53)            | 2.17 (1.12; 3.22)               |
| Yes                                     | 2.08 (1.03; 3.14)              | 2.24 (1.18; 3.30)            | -0.16 (-0.71; 0.39)            | 1.79 (0.74; 2.84)               |
